# Supplementary material
Source: PubMed Central journal article supplement (PMC5910050)
Supplement: Supp_Fig1.pdf [file Supp_Fig1.pdf]

## Supplementary Data

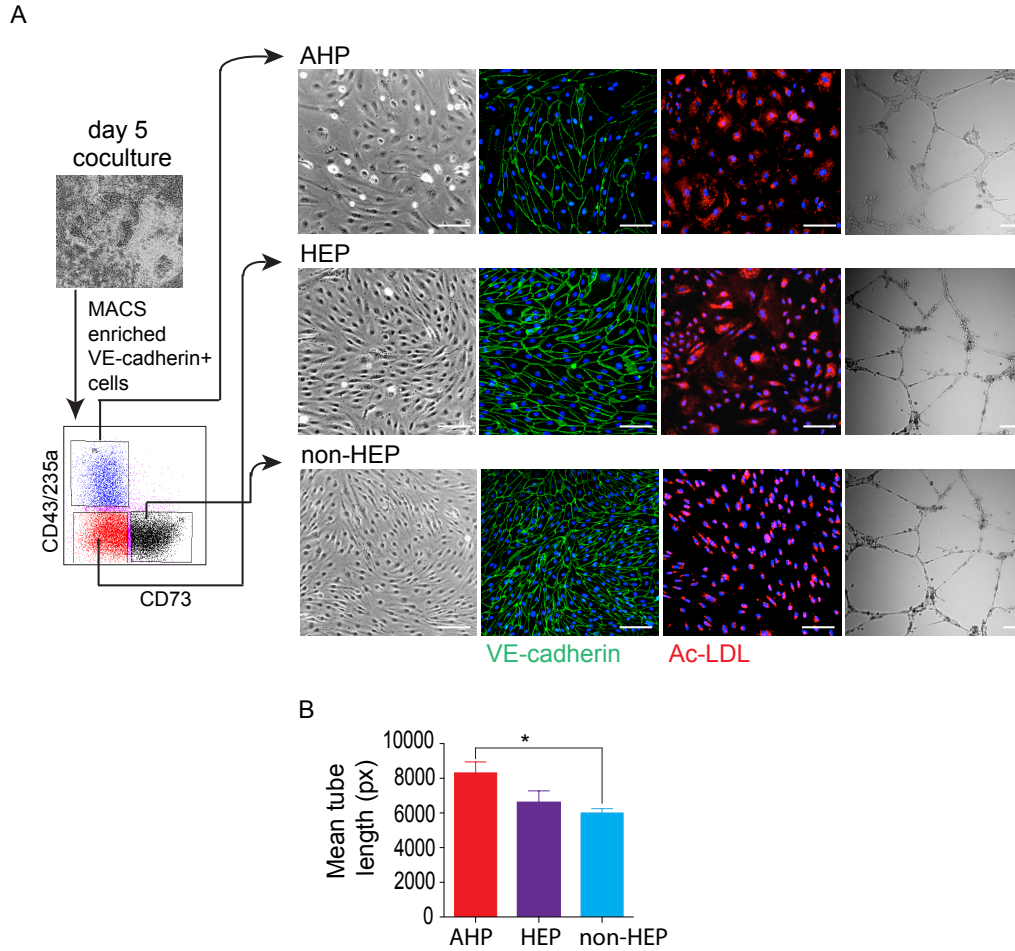

**SUPPLEMENTARY FIG. S1.** Characterization of V<sup>+</sup> ECs isolated from fibroblast derived iPSCs (A) Phenotype and functionality of endothelial subsets studied by immunostaining, ACLDL uptake and tube formation. (B) Quantification of the tubes formed by each subset. Results represent the average  $\pm$ SEM of 3 independent experiments. \*  $P < .05$  by Student paired  $t$  test. Scale bar represents 100 $\mu$ m.
