# Supplementary material
Source: PubMed Central journal article supplement (PMC5910050)
Supplement: Supp_Fig2.pdf [file Supp_Fig2.pdf]

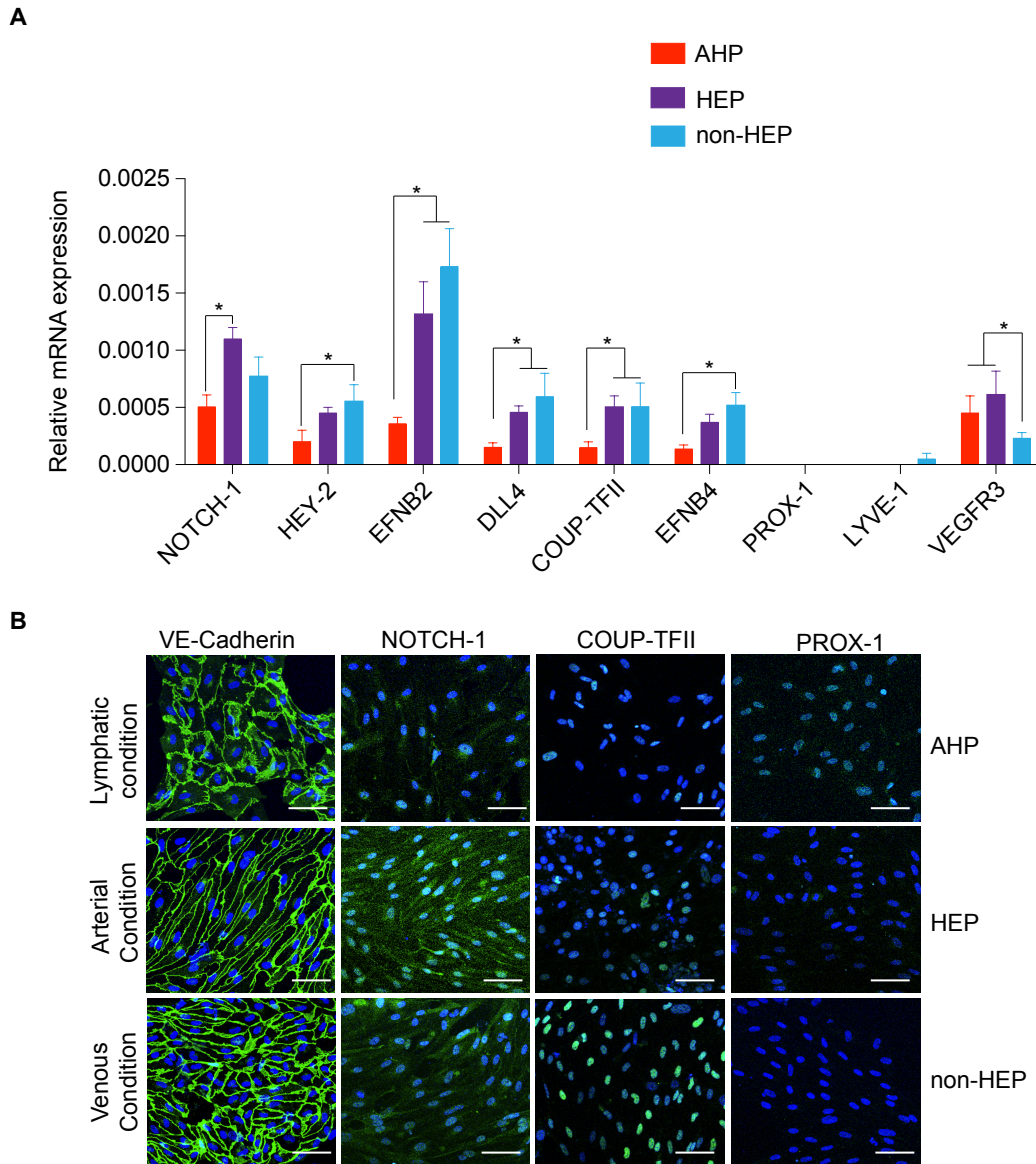

**SUPPLEMENTARY FIG. S2.** (A) Day 5  $V^+$  ECs were FACS sorted and RNA was isolated from the three subsets. cDNA was transcribed and gene expression of arterial, venous and lymphatic genes was studied by qRT-PCR. Results represent the average  $\pm$  SEM of 3 independent experiments. \*  $P < .05$  by Student paired  $t$  test. (B) Day 5 subsets isolated from fibroblast derived iPSCs were cultured in the arterial, venous and lymphatic conditions and immunostained for NOTCH-1, COUP-TFII and Prox-1. Scale bar represents 50 $\mu$ m.
