# Supplementary material
Source: PubMed Central journal article supplement (PMC5910050)
Supplement: Supp_Table1.pdf [file Supp_Table1.pdf]

SUPPLEMENTARY TABLE S1. LIST OF PRIMERS

| <b>PRIMER</b> | <b>SEQUENCE</b>                                      |
|---------------|------------------------------------------------------|
| COUP-TFII     | TGGTTCCAAACCAGTTTATTCTGT<br>AAGTGCGTTTCCATCATCTTTGAG |
| EFN B4        | CCAGCCTCAAATCGTGGCCCG<br>TTTGATGGCCCGAAGCCACTCG      |
| EFN B2        | CTCCTCAACTGTGCCAAACCA<br>GGTTATCCAGGCCCTCCAAA        |
| NOTCH I       | CAATGTG GATGCCGCAGTTGTG<br>CAGCACCTTGGCGGTCTCGTA     |
| HEY-2         | TTCAAGGCAGCTCGGTAAGTAC<br>CATACTGATGCACTGCTGGATGG    |
| DLL4          | CAGTGGGCAGCGAAGCTACA<br>ACAGGCAGTGGTAGCCATCCTC       |
| PROX-1        | CCCGCCAGGTTCTCAGGTCT<br>TGCCAAAGGTGTCCAGGGGGT        |
| LYVE-1        | CGAGGCTCCTGGTCCAAGGCT<br>GCTGCTGGTTCGCCTTTTTGCT      |
| VEGFR3        | CTGCCCTCTTCTGAGCTCT<br>CTGCCCTCTTCTGAGCTCT           |
| NOS3          | GTGGCTGTCTGCATGGACCT<br>CCACGATGGTGACTTTGGCT         |
| CCL2          | AAGATCTCAGTGCAGAGGCTCG<br>TTGCTTGTCCAGGTGGTCCAT      |
| CCL5          | GCTGCTTTGCCTACATT<br>CATTTCTTCTCTGGGTTG              |
| CXCL10        | GTGGCATTCAAGGAGTACCT<br>GCCTTCGATTCTGGATTGAG         |
| IL8           | ACTGAGAGTGATTGAGAGTGGAC<br>AACCTCTGCACCCAGTTTTTC     |
